# Supplementary material for: Liquid-Crystal and Fire-Retardant Properties of New Hexasubstituted Cyclotriphosphazene Compounds with Two Schiff Base Linking Units
Source: MDPI journal article supplement (doi:10.3390/molecules25092122), 2020-05-01
Supplement: s1 [file s1]

## Supplementary Materials

*Article*

# Liquid-Crystal and Fire-Retardant Properties of New Hexasubstituted Cyclotriphosphazene Compounds with Two Schiff Base Linking Units

Zuhair Jamain <sup>1,2,\*</sup>, Melati Khairuddean <sup>2,\*</sup> and Tay Guan-Seng <sup>3</sup>

<sup>1</sup> Faculty of Science and Natural Resources, Universiti Malaysia Sabah (UMS), Kota Kinabalu 88400, Malaysia

<sup>2</sup> School of Chemical Sciences, Universiti Sains Malaysia (USM), Penang 11800, Malaysia

<sup>3</sup> School of Industrial Technology, Universiti Sains Malaysia (USM), Penang 11800, Malaysia; [taygs@usm.my](mailto:taygs@usm.my)

\* Correspondence: [zuhairjamain@ums.edu.my](mailto:zuhairjamain@ums.edu.my) (Z.J.); [melati@usm.my](mailto:melati@usm.my) (M.K.)

Supplementary Materials–DSC thermogram of compounds 4a-i

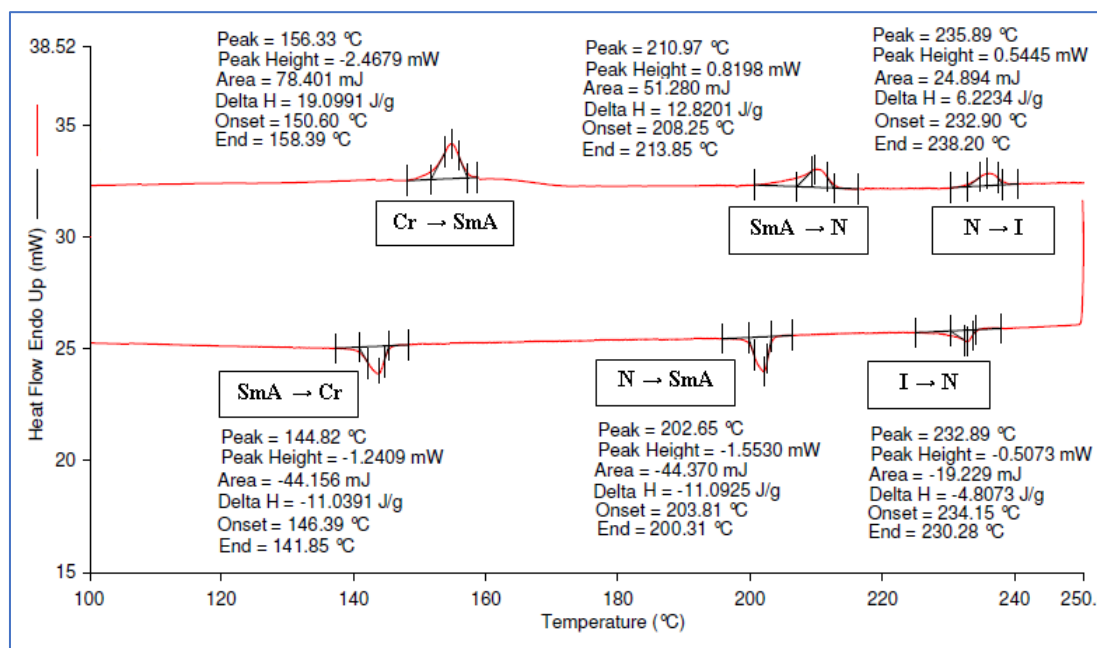

Figure S1. DSC thermogram of compound 4a

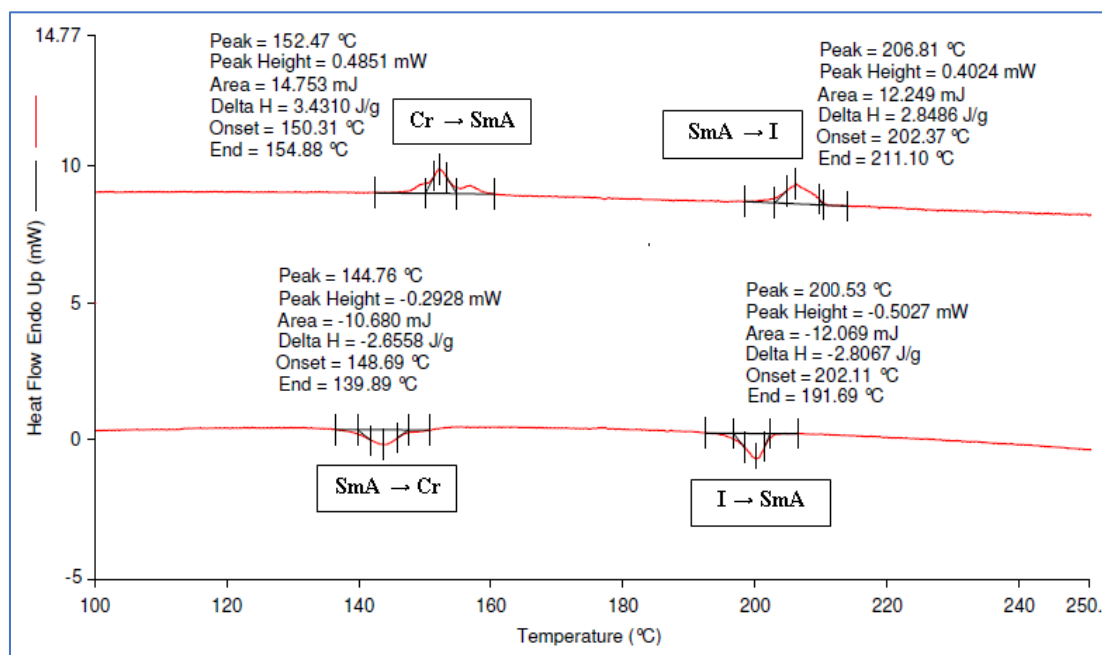

Figure S2. DSC thermogram of compound 4b

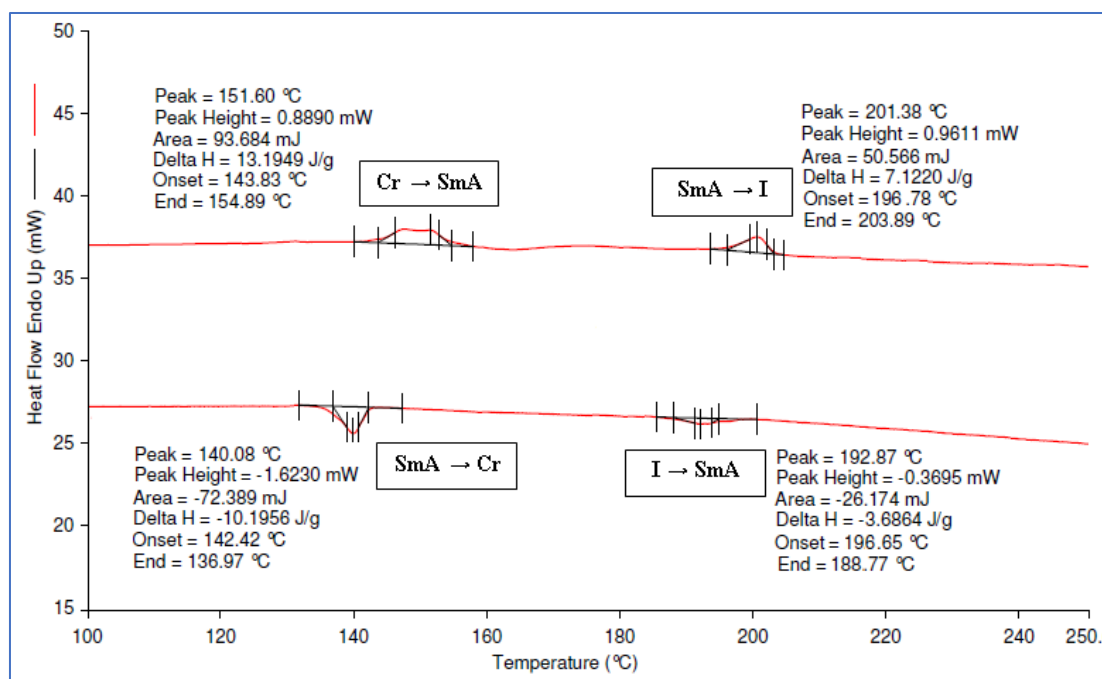

Figure S3. DSC thermogram of compound 4c

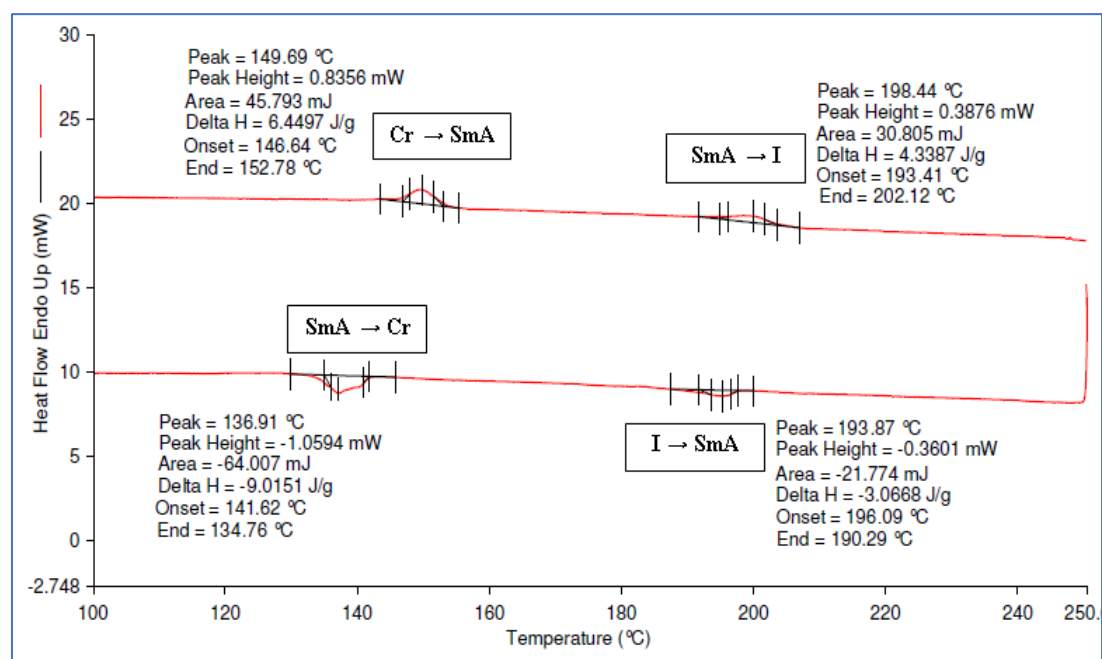

Figure S4. DSC thermogram of compound 4d

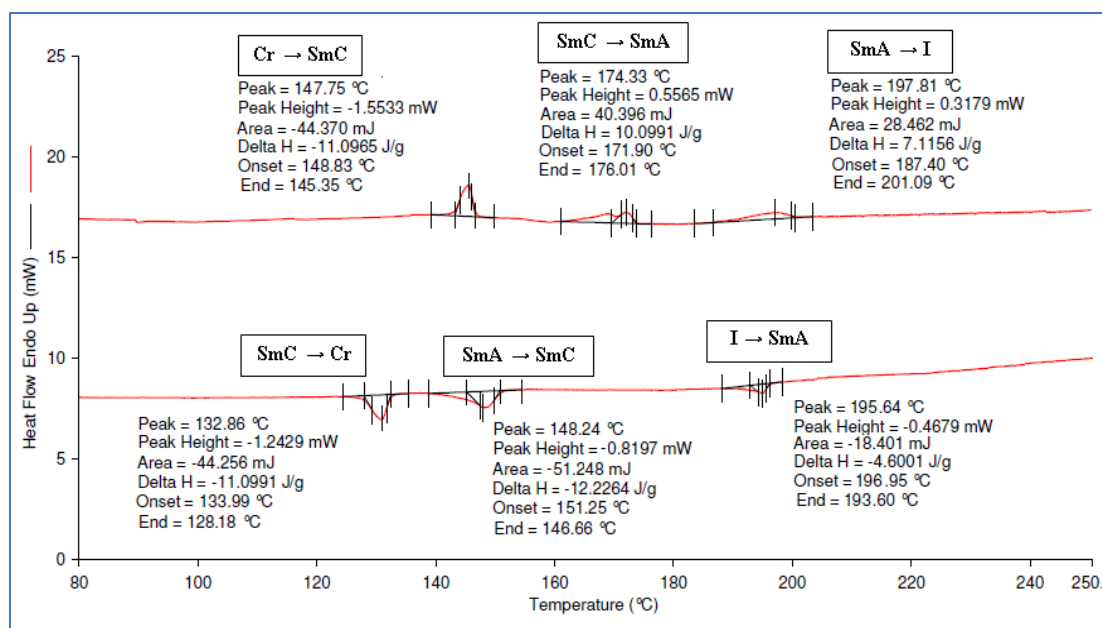

Figure S5. DSC thermogram of compound 4e

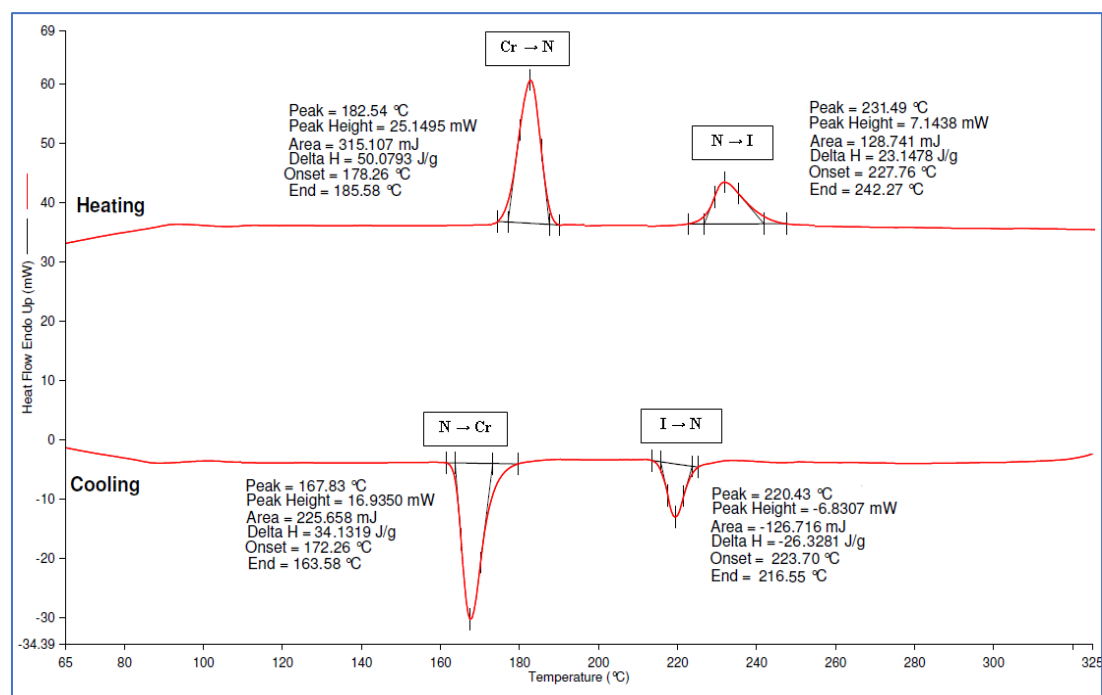

Figure S6. DSC thermogram of compound 4f

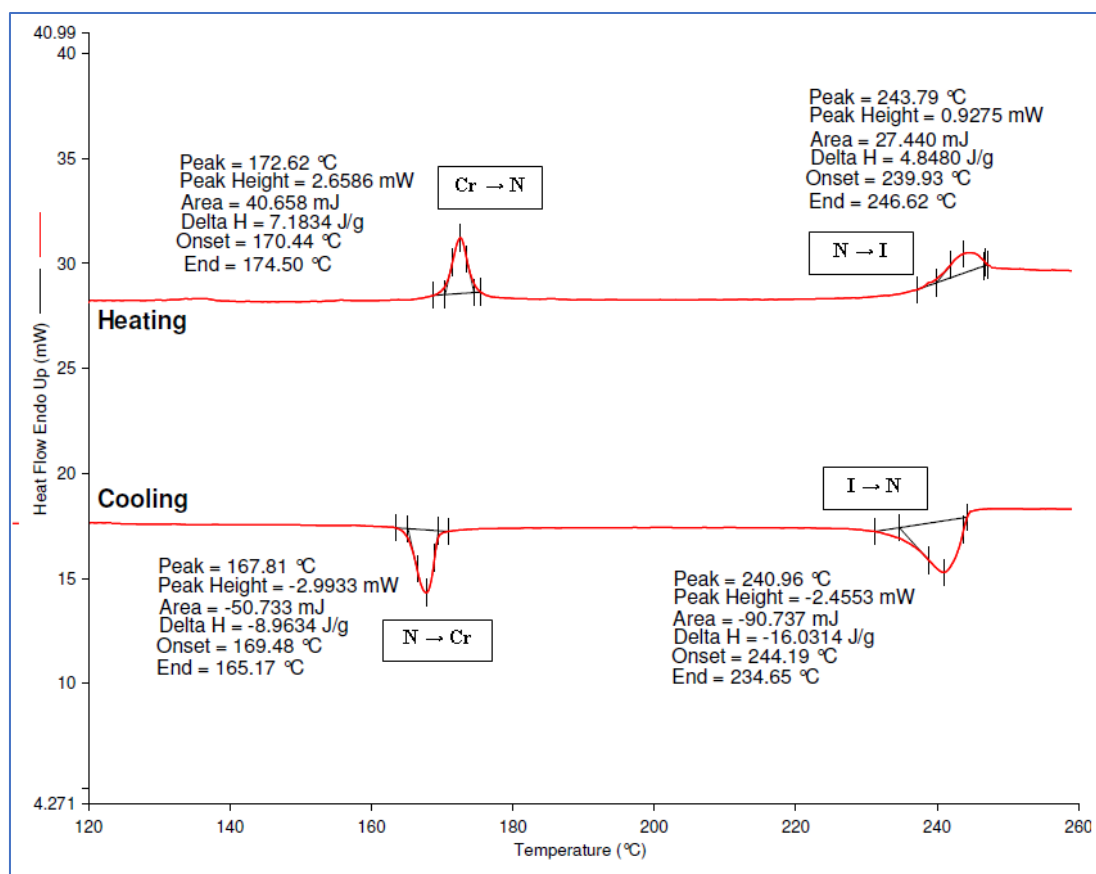

Figure S7. DSC thermogram of compound **4g**

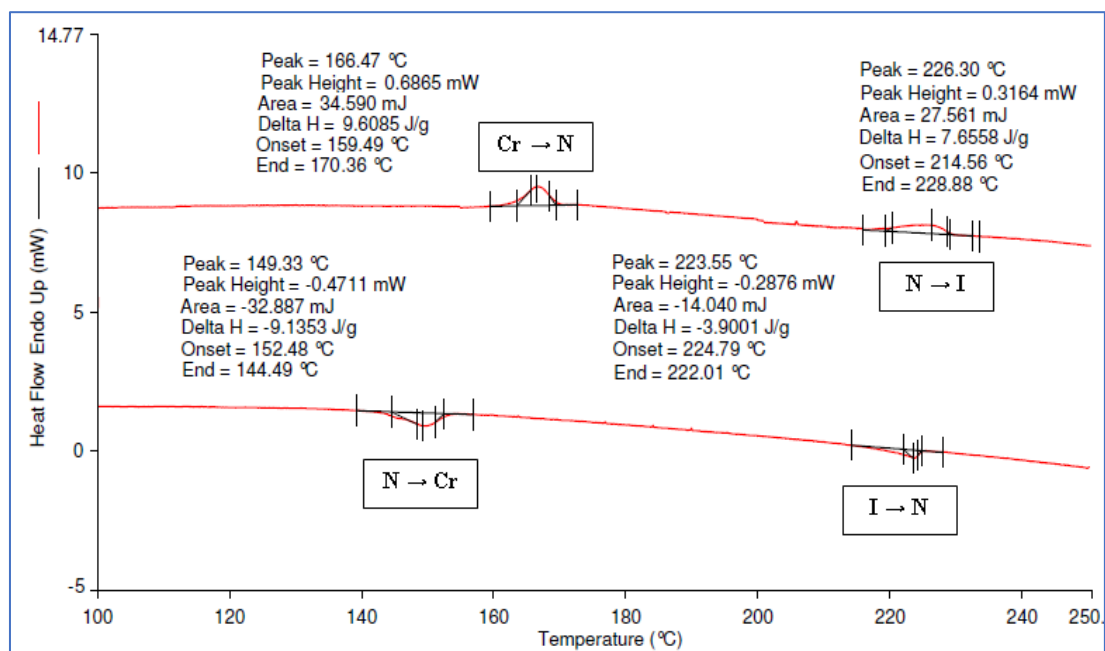

Figure S8. DSC thermogram of compound **4h**

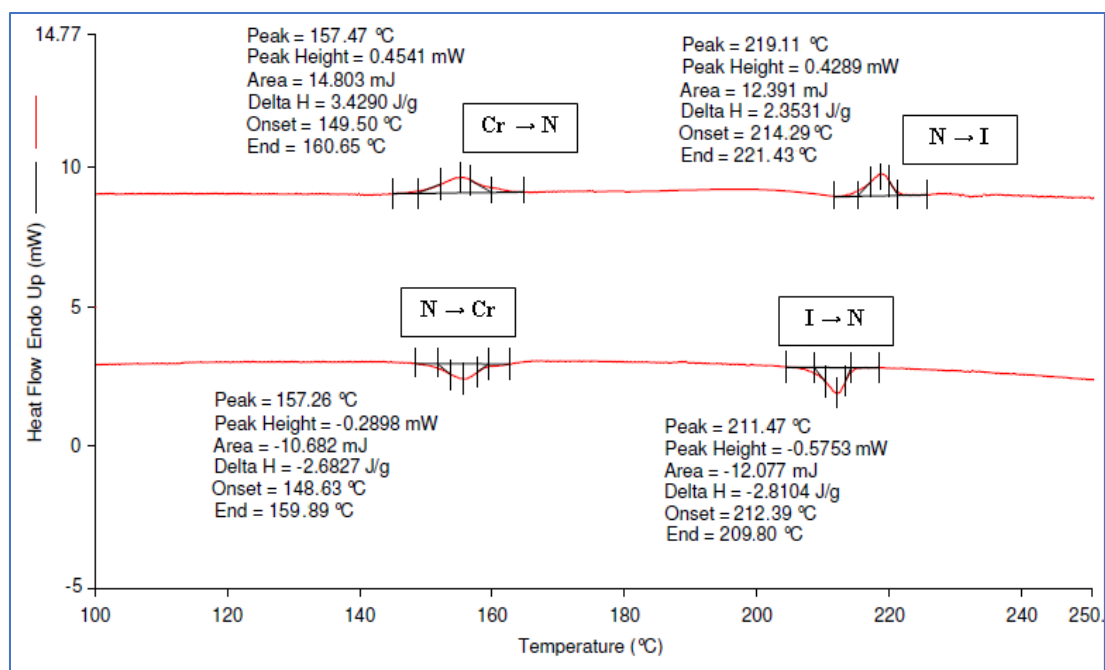

**Figure S9.** DSC thermogram of compound **4i**
